# Supplementary material for: Biopolymeric Ni3S4/Ag2S/TiO2/Calcium Alginate Aerogel for the Decontamination of Pharmaceutical Drug and Microbial Pollutants from Wastewater
Source: MDPI journal article supplement (doi:10.3390/nano12203642), 2022-10-17
Supplement: s1 [file s1]

# Biopolymeric $\text{Ni}_3\text{S}_4/\text{Ag}_2\text{S}/\text{TiO}_2$ /calcium alginate aerogel for the decontamination of pharmaceutical drug and microbial pollutants from wastewater

Rajeev Kumar <sup>a,\*</sup> Mohammad Oves<sup>b</sup>, Mohammad Omaish Ansari<sup>c</sup>, Md Abu Taleb,<sup>a</sup> M. A. Barakat<sup>a\*</sup>,

M.A. Alghamdi<sup>a</sup> and N. H. Al-Makishah<sup>a</sup>

<sup>a</sup>Department of Environmental Sciences, Faculty of Meteorology, Environment and Arid Land Agriculture, King Abdulaziz University, Jeddah-21589, Saudi Arabia

<sup>b</sup>Central of Excellence in Environmental Studies, King Abdulaziz University, Jeddah, Saudi Arabia

<sup>c</sup>Central of Nanotechnology, King Abdulaziz University, Jeddah, Saudi Arabia

\*Corresponding Author; R. Kumar; Email: rsingh@kau.edu.sa

M. A. Barakat; Email: mabarakat@gmail.com

## Morphological Analysis

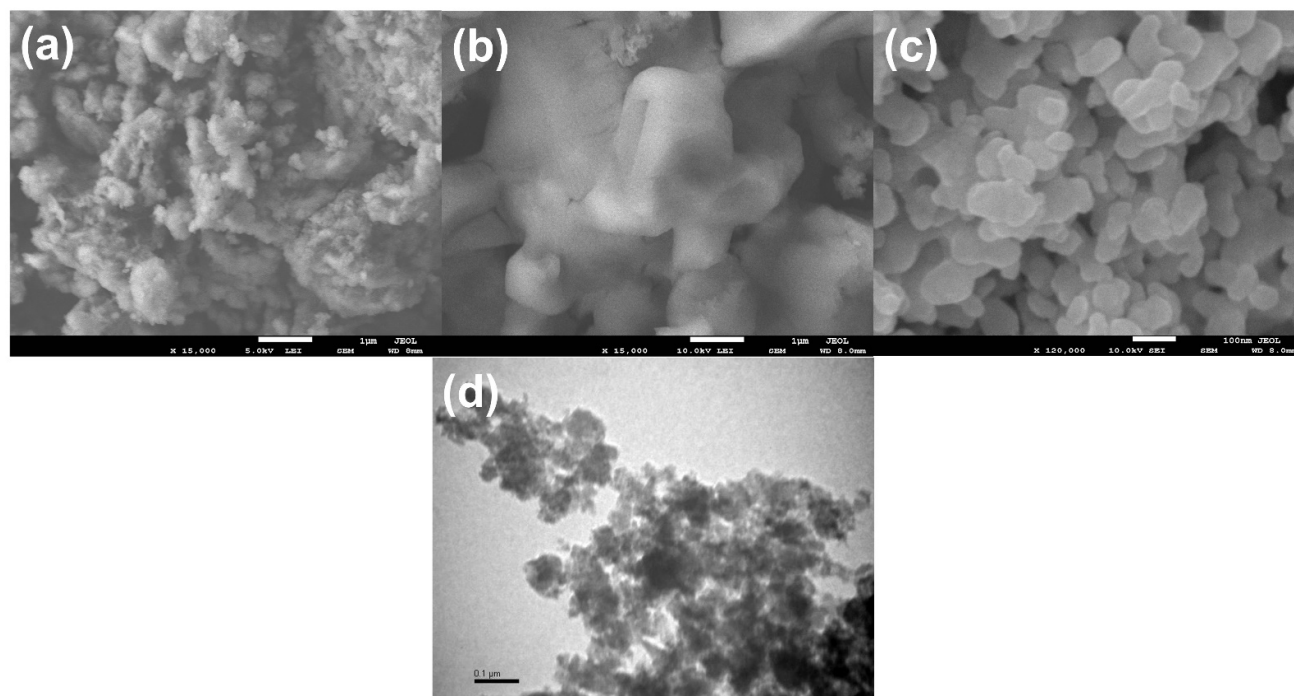

**Figure S1.** SEM image of modified  $\text{TiO}_2$  (a),  $\text{Ni}_3\text{S}_4$  (b) and  $\text{Ag}_2\text{S}$  (c). TEM image of modified  $\text{TiO}_2$  (d).
